# Supplementary material
Source: publisher figshare collection journal article supplement (https://acs.figshare.com/ndownloader/files/4172590)
Supplement: Supplementary file 1 [file 4172590]

 
data_cyg14s 
  
_audit_creation_method            SHELXL-97 
_chemical_name_systematic 
; 
 ? 
; 
_chemical_name_common             ? 
_chemical_melting_point           ? 
_chemical_formula_moiety          'C27 H23 N3 O2' 
_chemical_formula_sum 
 'C27 H23 N3 O2' 
_chemical_formula_weight          421.48 
  
loop_ 
 _atom_type_symbol 
 _atom_type_description 
 _atom_type_scat_dispersion_real 
 _atom_type_scat_dispersion_imag 
 _atom_type_scat_source 
 'C'  'C'   0.0033   0.0016 
 'International Tables Vol C Tables 4.2.6.8 and 6.1.1.4' 
 'H'  'H'   0.0000   0.0000 
 'International Tables Vol C Tables 4.2.6.8 and 6.1.1.4' 
 'N'  'N'   0.0061   0.0033 
 'International Tables Vol C Tables 4.2.6.8 and 6.1.1.4' 
 'O'  'O'   0.0106   0.0060 
 'International Tables Vol C Tables 4.2.6.8 and 6.1.1.4' 
  
_symmetry_cell_setting            Monoclinic 
_symmetry_space_group_name_H-M    P2(1)/c 
  
loop_ 
 _symmetry_equiv_pos_as_xyz 
 'x, y, z' 
 '-x, y+1/2, -z+1/2' 
 '-x, -y, -z' 
 'x, -y-1/2, z-1/2' 
  
_cell_length_a                    11.8860(5) 
_cell_length_b                    14.9940(6) 
_cell_length_c                    11.9745(5) 
_cell_angle_alpha                 90.00 
_cell_angle_beta                  93.4000(10) 
_cell_angle_gamma                 90.00 
_cell_volume                      2130.32(15) 
_cell_formula_units_Z             4 
_cell_measurement_temperature     103(2) 
_cell_measurement_reflns_used     3726 
_cell_measurement_theta_min       2.72 
_cell_measurement_theta_max       28.85 
  
_exptl_crystal_description        plate 
_exptl_crystal_colour             colourless 
_exptl_crystal_size_max           0.20 
_exptl_crystal_size_mid           0.18 
_exptl_crystal_size_min           0.06 
_exptl_crystal_density_meas       ? 
_exptl_crystal_density_diffrn     1.314 
_exptl_crystal_density_method     'not measured' 
_exptl_crystal_F_000              888 
_exptl_absorpt_coefficient_mu     0.084 
_exptl_absorpt_correction_type    multi-scan
_exptl_absorpt_correction_T_min   0.9833 
_exptl_absorpt_correction_T_max   0.9950 
_exptl_absorpt_process_details    sadabs 
  
_exptl_special_details 
; 
 ? 
; 
  
_diffrn_ambient_temperature       103(2) 
_diffrn_radiation_wavelength      0.71073 
_diffrn_radiation_type            MoK\a 
_diffrn_radiation_source          'fine-focus sealed tube' 
_diffrn_radiation_monochromator   graphite 
_diffrn_measurement_device_type   'Bruker APEX-II CCD' 
_diffrn_measurement_method        '\f and \w scans' 
_diffrn_detector_area_resol_mean  ? 
_diffrn_reflns_number             27596 
_diffrn_reflns_av_R_equivalents   0.0547 
_diffrn_reflns_av_sigmaI/netI     0.0551 
_diffrn_reflns_limit_h_min        -17 
_diffrn_reflns_limit_h_max        17 
_diffrn_reflns_limit_k_min        -22 
_diffrn_reflns_limit_k_max        20 
_diffrn_reflns_limit_l_min        -17 
_diffrn_reflns_limit_l_max        17 
_diffrn_reflns_theta_min          2.18 
_diffrn_reflns_theta_max          31.67 
_reflns_number_total              7172 
_reflns_number_gt                 4996 
_reflns_threshold_expression      >2sigma(I) 
  
_computing_data_collection        'Bruker APEX2' 
_computing_cell_refinement        'Bruker SAINT' 
_computing_data_reduction         'Bruker SAINT' 
_computing_structure_solution     'SHELXS-97 (Sheldrick, 2008)' 
_computing_structure_refinement   'SHELXL-97 (Sheldrick, 2008)' 
_computing_molecular_graphics     'Bruker SHELXTL' 
_computing_publication_material   'Bruker SHELXTL' 
  
_refine_special_details 
; 
 Refinement of F^2^ against ALL reflections.  The weighted R-factor wR and 
 goodness of fit S are based on F^2^, conventional R-factors R are based 
 on F, with F set to zero for negative F^2^. The threshold expression of 
 F^2^ > 2sigma(F^2^) is used only for calculating R-factors(gt) etc. and is 
 not relevant to the choice of reflections for refinement.  R-factors based 
 on F^2^ are statistically about twice as large as those based on F, and R- 
 factors based on ALL data will be even larger. 
; 
  
_refine_ls_structure_factor_coef  Fsqd 
_refine_ls_matrix_type            full 
_refine_ls_weighting_scheme       calc 
_refine_ls_weighting_details 
 'calc w=1/[\s^2^(Fo^2^)+(0.0831P)^2^+0.0000P] where P=(Fo^2^+2Fc^2^)/3' 
_atom_sites_solution_primary      direct 
_atom_sites_solution_secondary    difmap 
_atom_sites_solution_hydrogens    geom 
_refine_ls_hydrogen_treatment     constr
_refine_ls_extinction_method      none 
_refine_ls_extinction_coef        ? 
_refine_ls_number_reflns          7172 
_refine_ls_number_parameters      289 
_refine_ls_number_restraints      0 
_refine_ls_R_factor_all           0.0832 
_refine_ls_R_factor_gt            0.0499 
_refine_ls_wR_factor_ref          0.1494 
_refine_ls_wR_factor_gt           0.1234 
_refine_ls_goodness_of_fit_ref    1.047 
_refine_ls_restrained_S_all       1.047 
_refine_ls_shift/su_max           0.001 
_refine_ls_shift/su_mean          0.000 
  
loop_ 
 _atom_site_label 
 _atom_site_type_symbol 
 _atom_site_fract_x 
 _atom_site_fract_y 
 _atom_site_fract_z 
 _atom_site_U_iso_or_equiv 
 _atom_site_adp_type 
 _atom_site_occupancy 
 _atom_site_symmetry_multiplicity 
 _atom_site_calc_flag 
 _atom_site_refinement_flags 
 _atom_site_disorder_assembly 
 _atom_site_disorder_group 
C1 C 0.88903(10) 0.06126(9) 0.73915(11) 0.0144(2) Uani 1 1 d . . . 
C2 C 0.94981(10) 0.05136(11) 0.85294(12) 0.0203(3) Uani 1 1 d . . . 
H2A H 0.9331 -0.0071 0.8866 0.024 Uiso 1 1 calc R . . 
H2B H 0.9279 0.0993 0.9041 0.024 Uiso 1 1 calc R . . 
C3 C 1.07413(10) 0.05850(9) 0.82920(11) 0.0163(3) Uani 1 1 d . . . 
H3A H 1.1187 0.0839 0.8941 0.020 Uiso 1 1 calc R . . 
H3B H 1.1055 -0.0005 0.8109 0.020 Uiso 1 1 calc R . . 
C4 C 1.07359(10) 0.12081(9) 0.72916(11) 0.0158(3) Uani 1 1 d . . . 
H4A H 1.0750 0.1840 0.7531 0.019 Uiso 1 1 calc R . . 
H4B H 1.1388 0.1093 0.6835 0.019 Uiso 1 1 calc R . . 
C5 C 0.94861(9) 0.10790(8) 0.55453(11) 0.0130(2) Uani 1 1 d . . . 
C6 C 1.00931(10) 0.14982(8) 0.47669(11) 0.0138(2) Uani 1 1 d . . . 
C7 C 0.95308(10) 0.13157(9) 0.36786(11) 0.0163(3) Uani 1 1 d . . . 
C8 C 0.84901(10) 0.06145(9) 0.49716(11) 0.0135(2) Uani 1 1 d . . . 
H8 H 0.8551 -0.0042 0.5108 0.016 Uiso 1 1 calc R . . 
C9 C 0.73338(9) 0.09463(9) 0.53048(11) 0.0129(2) Uani 1 1 d . . . 
H9 H 0.6767 0.0696 0.4739 0.016 Uiso 1 1 calc R . . 
C10 C 0.72289(10) 0.19528(9) 0.52211(11) 0.0144(2) Uani 1 1 d . . . 
C11 C 0.67520(12) 0.23177(10) 0.42343(12) 0.0212(3) Uani 1 1 d . . . 
H11 H 0.6497 0.1935 0.3640 0.025 Uiso 1 1 calc R . . 
C12 C 0.66452(13) 0.32343(11) 0.41097(14) 0.0270(3) Uani 1 1 d . . . 
H12 H 0.6312 0.3478 0.3437 0.032 Uiso 1 1 calc R . . 
C13 C 0.70287(12) 0.37917(10) 0.49745(14) 0.0261(3) Uani 1 1 d . . . 
H13 H 0.6967 0.4420 0.4891 0.031 Uiso 1 1 calc R . . 
C14 C 0.74994(11) 0.34350(10) 0.59556(14) 0.0239(3) Uani 1 1 d . . . 
H14 H 0.7759 0.3820 0.6546 0.029 Uiso 1 1 calc R . . 
C15 C 0.75962(10) 0.25184(9) 0.60868(12) 0.0183(3) Uani 1 1 d . . . 
H15 H 0.7914 0.2277 0.6768 0.022 Uiso 1 1 calc R . . 
C16 C 0.59616(9) 0.04195(9) 0.66414(11) 0.0139(2) Uani 1 1 d . . . 
C17 C 0.57147(10) -0.01891(10) 0.74689(13) 0.0202(3) Uani 1 1 d . . . 
H17 H 0.6299 -0.0546 0.7812 0.024 Uiso 1 1 calc R . . 
C18 C 0.46226(11) -0.02784(11) 0.77957(13) 0.0235(3) Uani 1 1 d . . . 
H18 H 0.4465 -0.0694 0.8364 0.028 Uiso 1 1 calc R . . 
C19 C 0.37566(11) 0.02314(10) 0.73031(13) 0.0221(3) Uani 1 1 d . . . 
H19 H 0.3012 0.0179 0.7543 0.027 Uiso 1 1 calc R . . 
C20 C 0.39929(10) 0.08171(10) 0.64562(13) 0.0206(3) Uani 1 1 d . . . 
H20 H 0.3401 0.1160 0.6104 0.025 Uiso 1 1 calc R . . 
C21 C 0.50870(10) 0.09125(9) 0.61115(12) 0.0177(3) Uani 1 1 d . . . 
H21 H 0.5236 0.1310 0.5520 0.021 Uiso 1 1 calc R . . 
C22 C 1.11092(10) 0.20689(9) 0.48662(11) 0.0148(2) Uani 1 1 d . . . 
C23 C 1.19911(10) 0.19244(10) 0.41608(12) 0.0187(3) Uani 1 1 d . . . 
H23 H 1.1934 0.1460 0.3620 0.022 Uiso 1 1 calc R . . 
C24 C 1.29522(11) 0.24587(11) 0.42486(13) 0.0248(3) Uani 1 1 d . . . 
H24 H 1.3543 0.2361 0.3762 0.030 Uiso 1 1 calc R . . 
C25 C 1.30485(12) 0.31306(11) 0.50413(14) 0.0273(3) Uani 1 1 d . . . 
H25 H 1.3713 0.3484 0.5113 0.033 Uiso 1 1 calc R . . 
C26 C 1.21711(12) 0.32867(10) 0.57304(13) 0.0229(3) Uani 1 1 d . . . 
H26 H 1.2235 0.3750 0.6271 0.028 Uiso 1 1 calc R . . 
C27 C 1.11991(11) 0.27688(9) 0.56341(12) 0.0179(3) Uani 1 1 d . . . 
H27 H 1.0593 0.2892 0.6094 0.021 Uiso 1 1 calc R . . 
N1 N 0.96593(8) 0.09856(7) 0.66642(9) 0.0135(2) Uani 1 1 d . . . 
N2 N 0.70965(8) 0.05436(8) 0.63706(9) 0.0152(2) Uani 1 1 d . . . 
N3 N 0.78392(8) 0.04199(8) 0.72800(10) 0.0160(2) Uani 1 1 d . . . 
O1 O 0.97576(8) 0.15492(7) 0.27543(8) 0.0231(2) Uani 1 1 d . . . 
O2 O 0.85889(7) 0.07924(6) 0.38112(8) 0.0162(2) Uani 1 1 d . . . 
  
loop_ 
 _atom_site_aniso_label 
 _atom_site_aniso_U_11 
 _atom_site_aniso_U_22 
 _atom_site_aniso_U_33 
 _atom_site_aniso_U_23 
 _atom_site_aniso_U_13 
 _atom_site_aniso_U_12 
C1 0.0122(5) 0.0169(6) 0.0144(6) 0.0009(5) 0.0028(4) -0.0004(4) 
C2 0.0137(5) 0.0317(8) 0.0154(6) 0.0024(6) 0.0006(5) -0.0023(5) 
C3 0.0118(5) 0.0210(7) 0.0160(6) -0.0001(5) -0.0011(4) 0.0002(4) 
C4 0.0106(5) 0.0196(7) 0.0171(6) -0.0007(5) -0.0003(4) -0.0015(4) 
C5 0.0111(5) 0.0132(6) 0.0147(6) -0.0016(5) 0.0022(4) 0.0013(4) 
C6 0.0127(5) 0.0146(6) 0.0141(6) -0.0016(5) 0.0022(4) -0.0002(4) 
C7 0.0138(5) 0.0181(7) 0.0173(6) -0.0021(5) 0.0026(4) -0.0011(4) 
C8 0.0123(5) 0.0151(6) 0.0133(6) -0.0014(5) 0.0021(4) -0.0004(4) 
C9 0.0105(5) 0.0154(6) 0.0130(6) -0.0006(5) 0.0021(4) -0.0003(4) 
C10 0.0112(5) 0.0161(6) 0.0162(6) -0.0002(5) 0.0039(4) 0.0007(4) 
C11 0.0257(6) 0.0203(7) 0.0176(7) 0.0019(6) 0.0022(5) 0.0013(5) 
C12 0.0345(8) 0.0243(8) 0.0230(8) 0.0076(6) 0.0079(6) 0.0067(6) 
C13 0.0263(7) 0.0152(7) 0.0382(9) 0.0044(6) 0.0126(6) 0.0029(5) 
C14 0.0184(6) 0.0175(7) 0.0360(9) -0.0074(6) 0.0030(6) 0.0007(5) 
C15 0.0147(5) 0.0185(7) 0.0214(7) -0.0029(6) -0.0004(5) 0.0028(5) 
C16 0.0099(5) 0.0152(6) 0.0169(6) -0.0023(5) 0.0021(4) -0.0011(4) 
C17 0.0119(5) 0.0216(7) 0.0270(7) 0.0074(6) 0.0013(5) -0.0006(5) 
C18 0.0156(6) 0.0291(8) 0.0259(8) 0.0091(6) 0.0028(5) -0.0046(5) 
C19 0.0123(5) 0.0291(8) 0.0251(7) 0.0017(6) 0.0034(5) -0.0036(5) 
C20 0.0114(5) 0.0240(7) 0.0262(7) 0.0030(6) -0.0001(5) 0.0009(5) 
C21 0.0124(5) 0.0204(7) 0.0204(7) 0.0034(6) 0.0014(4) -0.0009(4) 
C22 0.0125(5) 0.0169(6) 0.0150(6) 0.0026(5) 0.0008(4) -0.0011(4) 
C23 0.0155(5) 0.0214(7) 0.0195(7) 0.0021(6) 0.0034(5) 0.0006(5) 
C24 0.0145(5) 0.0318(8) 0.0285(8) 0.0085(7) 0.0050(5) -0.0021(5) 
C25 0.0181(6) 0.0287(8) 0.0343(9) 0.0089(7) -0.0045(6) -0.0082(5) 
C26 0.0237(6) 0.0189(7) 0.0255(7) 0.0020(6) -0.0047(5) -0.0050(5) 
C27 0.0177(5) 0.0174(7) 0.0184(7) 0.0012(5) -0.0001(5) -0.0018(5) 
N1 0.0099(4) 0.0166(5) 0.0140(5) 0.0001(4) 0.0005(4) -0.0010(4) 
N2 0.0092(4) 0.0208(6) 0.0155(5) 0.0037(5) 0.0007(4) -0.0011(4) 
N3 0.0119(4) 0.0202(6) 0.0160(5) 0.0009(5) 0.0005(4) 0.0005(4) 
O1 0.0231(5) 0.0316(6) 0.0148(5) 0.0005(4) 0.0030(4) -0.0079(4) 
O2 0.0145(4) 0.0208(5) 0.0136(4) -0.0033(4) 0.0029(3) -0.0035(3) 
  
_geom_special_details 
; 
 All esds (except the esd in the dihedral angle between two l.s. planes) 
 are estimated using the full covariance matrix.  The cell esds are taken 
 into account individually in the estimation of esds in distances, angles 
 and torsion angles; correlations between esds in cell parameters are only 
 used when they are defined by crystal symmetry.  An approximate (isotropic) 
 treatment of cell esds is used for estimating esds involving l.s. planes. 
; 
  
loop_ 
 _geom_bond_atom_site_label_1 
 _geom_bond_atom_site_label_2 
 _geom_bond_distance 
 _geom_bond_site_symmetry_2 
 _geom_bond_publ_flag 
C1 N3 1.2815(15) . ? 
C1 N1 1.4146(16) . ? 
C1 C2 1.5112(19) . ? 
C2 C3 1.5250(17) . ? 
C2 H2A 0.9900 . ? 
C2 H2B 0.9900 . ? 
C3 C4 1.5188(19) . ? 
C3 H3A 0.9900 . ? 
C3 H3B 0.9900 . ? 
C4 N1 1.4829(15) . ? 
C4 H4A 0.9900 . ? 
C4 H4B 0.9900 . ? 
C5 N1 1.3508(17) . ? 
C5 C6 1.3653(17) . ? 
C5 C8 1.5039(17) . ? 
C6 C7 1.4549(18) . ? 
C6 C22 1.4792(17) . ? 
C7 O1 1.2064(16) . ? 
C7 O2 1.3840(15) . ? 
C8 O2 1.4266(16) . ? 
C8 C9 1.5364(16) . ? 
C8 H8 1.0000 . ? 
C9 N2 1.4546(16) . ? 
C9 C10 1.5172(18) . ? 
C9 H9 1.0000 . ? 
C10 C15 1.3894(19) . ? 
C10 C11 1.3919(19) . ? 
C11 C12 1.388(2) . ? 
C11 H11 0.9500 . ? 
C12 C13 1.387(2) . ? 
C12 H12 0.9500 . ? 
C13 C14 1.379(2) . ? 
C13 H13 0.9500 . ? 
C14 C15 1.387(2) . ? 
C14 H14 0.9500 . ? 
C15 H15 0.9500 . ? 
C16 C17 1.3911(19) . ? 
C16 C21 1.3969(17) . ? 
C16 N2 1.4183(15) . ? 
C17 C18 1.3843(18) . ? 
C17 H17 0.9500 . ? 
C18 C19 1.386(2) . ? 
C18 H18 0.9500 . ? 
C19 C20 1.383(2) . ? 
C19 H19 0.9500 . ? 
C20 C21 1.3949(17) . ? 
C20 H20 0.9500 . ? 
C21 H21 0.9500 . ? 
C22 C27 1.3952(19) . ? 
C22 C23 1.4015(18) . ? 
C23 C24 1.3941(19) . ? 
C23 H23 0.9500 . ? 
C24 C25 1.384(2) . ? 
C24 H24 0.9500 . ? 
C25 C26 1.388(2) . ? 
C25 H25 0.9500 . ? 
C26 C27 1.3911(18) . ? 
C26 H26 0.9500 . ? 
C27 H27 0.9500 . ? 
N2 N3 1.3731(15) . ? 
  
loop_ 
 _geom_angle_atom_site_label_1 
 _geom_angle_atom_site_label_2 
 _geom_angle_atom_site_label_3 
 _geom_angle 
 _geom_angle_site_symmetry_1 
 _geom_angle_site_symmetry_3 
 _geom_angle_publ_flag 
N3 C1 N1 133.36(12) . . ? 
N3 C1 C2 118.86(11) . . ? 
N1 C1 C2 107.58(10) . . ? 
C1 C2 C3 103.99(10) . . ? 
C1 C2 H2A 111.0 . . ? 
C3 C2 H2A 111.0 . . ? 
C1 C2 H2B 111.0 . . ? 
C3 C2 H2B 111.0 . . ? 
H2A C2 H2B 109.0 . . ? 
C4 C3 C2 103.38(10) . . ? 
C4 C3 H3A 111.1 . . ? 
C2 C3 H3A 111.1 . . ? 
C4 C3 H3B 111.1 . . ? 
C2 C3 H3B 111.1 . . ? 
H3A C3 H3B 109.1 . . ? 
N1 C4 C3 102.96(10) . . ? 
N1 C4 H4A 111.2 . . ? 
C3 C4 H4A 111.2 . . ? 
N1 C4 H4B 111.2 . . ? 
C3 C4 H4B 111.2 . . ? 
H4A C4 H4B 109.1 . . ? 
N1 C5 C6 132.01(11) . . ? 
N1 C5 C8 118.33(11) . . ? 
C6 C5 C8 109.56(11) . . ? 
C5 C6 C7 106.96(11) . . ? 
C5 C6 C22 132.33(12) . . ? 
C7 C6 C22 120.68(11) . . ? 
O1 C7 O2 119.74(12) . . ? 
O1 C7 C6 130.65(12) . . ? 
O2 C7 C6 109.60(11) . . ? 
O2 C8 C5 104.50(10) . . ? 
O2 C8 C9 108.60(10) . . ? 
C5 C8 C9 115.05(11) . . ? 
O2 C8 H8 109.5 . . ? 
C5 C8 H8 109.5 . . ? 
C9 C8 H8 109.5 . . ? 
N2 C9 C10 116.83(11) . . ? 
N2 C9 C8 108.45(10) . . ? 
C10 C9 C8 112.10(10) . . ? 
N2 C9 H9 106.3 . . ? 
C10 C9 H9 106.3 . . ? 
C8 C9 H9 106.3 . . ? 
C15 C10 C11 119.18(13) . . ? 
C15 C10 C9 122.47(12) . . ? 
C11 C10 C9 118.34(12) . . ? 
C12 C11 C10 120.71(14) . . ? 
C12 C11 H11 119.6 . . ? 
C10 C11 H11 119.6 . . ? 
C13 C12 C11 119.52(14) . . ? 
C13 C12 H12 120.2 . . ? 
C11 C12 H12 120.2 . . ? 
C14 C13 C12 120.09(14) . . ? 
C14 C13 H13 120.0 . . ? 
C12 C13 H13 120.0 . . ? 
C13 C14 C15 120.49(14) . . ? 
C13 C14 H14 119.8 . . ? 
C15 C14 H14 119.8 . . ? 
C14 C15 C10 119.99(13) . . ? 
C14 C15 H15 120.0 . . ? 
C10 C15 H15 120.0 . . ? 
C17 C16 C21 119.21(11) . . ? 
C17 C16 N2 119.51(11) . . ? 
C21 C16 N2 121.27(12) . . ? 
C18 C17 C16 120.38(12) . . ? 
C18 C17 H17 119.8 . . ? 
C16 C17 H17 119.8 . . ? 
C17 C18 C19 120.78(13) . . ? 
C17 C18 H18 119.6 . . ? 
C19 C18 H18 119.6 . . ? 
C20 C19 C18 118.98(12) . . ? 
C20 C19 H19 120.5 . . ? 
C18 C19 H19 120.5 . . ? 
C19 C20 C21 121.04(12) . . ? 
C19 C20 H20 119.5 . . ? 
C21 C20 H20 119.5 . . ? 
C20 C21 C16 119.54(13) . . ? 
C20 C21 H21 120.2 . . ? 
C16 C21 H21 120.2 . . ? 
C27 C22 C23 118.86(12) . . ? 
C27 C22 C6 121.23(11) . . ? 
C23 C22 C6 119.89(12) . . ? 
C24 C23 C22 120.30(14) . . ? 
C24 C23 H23 119.9 . . ? 
C22 C23 H23 119.9 . . ? 
C25 C24 C23 120.27(13) . . ? 
C25 C24 H24 119.9 . . ? 
C23 C24 H24 119.9 . . ? 
C24 C25 C26 119.73(13) . . ? 
C24 C25 H25 120.1 . . ? 
C26 C25 H25 120.1 . . ? 
C25 C26 C27 120.42(14) . . ? 
C25 C26 H26 119.8 . . ? 
C27 C26 H26 119.8 . . ? 
C26 C27 C22 120.35(13) . . ? 
C26 C27 H27 119.8 . . ? 
C22 C27 H27 119.8 . . ? 
C5 N1 C1 125.85(10) . . ? 
C5 N1 C4 123.74(10) . . ? 
C1 N1 C4 110.29(10) . . ? 
N3 N2 C16 112.11(10) . . ? 
N3 N2 C9 127.08(10) . . ? 
C16 N2 C9 119.45(10) . . ? 
C1 N3 N2 128.98(11) . . ? 
C7 O2 C8 109.37(10) . . ? 
  
_diffrn_measured_fraction_theta_max    0.996 
_diffrn_reflns_theta_full              31.67 
_diffrn_measured_fraction_theta_full   0.996 
_refine_diff_density_max    0.477 
_refine_diff_density_min   -0.405 
_refine_diff_density_rms    0.130 
